# Supplementary material for: Quantitative membrane proteomics reveals a role for tetraspanin enriched microdomains during entry of human cytomegalovirus
Source: PLoS One. 2017 Nov 9;12(11):e0187899. doi: 10.1371/journal.pone.0187899 (PMC5679760; doi:10.1371/journal.pone.0187899)
Supplement: S3 Table — Mock and AD169-infected HFFs were analyzed using tandem 2D-LC-MS/MS at 24h post infection. The algorithm ASAPRatio was used to analyze chances in protein abundance. (XLSX) [file pone.0187899.s004.xlsx]

## Sheet: Expt03_MockVsAD169
entry no.	protein	protein probability	percent coverage	xpress ratio mean	xpress stdev	xpress num peptides	ratio mean	ratio stdev	ratio num peps	adjusted ratio mean	adjusted ratio stdev	pvalue	num unique peps	tot num peps	percent share of spectrum id's	description
1	O00159|MYO1C_HUMAN	1	10.1	1.34	0.31	22	0.53	0.13	7	0.59	0.15	0.406	11	22	2.22	Myosin-Ic - Homo sapiens (Human) [MASS=118038]
2	O00264|PGRC1_HUMAN	1	7.7	0.82	0	1	1.24	0.1	1	1.37	0.12	0.596	2	2	0.22	Membrane-associated progesterone receptor component 1 - Homo sapiens (Human) [MASS=21671]
3	O14880|MGST3_HUMAN	1	9.9	1.47	0.16	5	1.04	0.05	1	1.15	0.07	0.812	2	5	0.55	Microsomal glutathione S-transferase 3 - Homo sapiens (Human) [MASS=16516]
4	O60313|OPA1_HUMAN	1	2.7	1.31	0.05	2	1.81	0.14	2	2	0.17	0.244	2	2	0.22	Dynamin-like 120 kDa protein, mitochondrial precursor - Homo sapiens (Human) [MASS=111657]
5	O60716|CTND1_HUMAN	1	3.8	1.86	0.27	5	0.46	0.09	3	0.51	0.1	0.28	3	5	0.55	Catenin delta-1 - Homo sapiens (Human) [MASS=108169]
6	O75947|ATP5H_HUMAN	1	18.6	1.24	0.05	8	0.66	0.22	2	0.73	0.25	0.645	3	8	0.88	ATP synthase D chain, mitochondrial - Homo sapiens (Human) [MASS=18491]
7	O75964|ATP5L_HUMAN	1	14.6	1.19	0.07	5	0.97	0.13	1	1.07	0.15	0.906	2	5	0.55	ATP synthase subunit g, mitochondrial - Homo sapiens (Human) [MASS=11428]
8	P00387|NB5R3_HUMAN	1	18.6	1.45	0.26	21	1.48	0.73	4	1.64	0.81	0.521	8	22	2.42	NADH-cytochrome b5 reductase 3 - Homo sapiens (Human) [MASS=34235]
9	P02768|ALBU_HUMAN	1	5.9	4.39	1.03	5	10.19	1.32	2	11.29	1.52	6.42e-05	2	5	0.55	Serum albumin precursor - Homo sapiens (Human) [MASS=69366]
10	P02786|TFR1_HUMAN	1	8.6	1.59	0.15	12	1.46	0.62	5	1.62	0.69	0.51	7	12	1.32	Transferrin receptor protein 1 - Homo sapiens (Human) [MASS=84871]
11	P04216|THY1_HUMAN	1	24.8	1.59	0.64	38	0.39	0.14	4	0.43	0.16	0.226	8	33	3.63	Thy-1 membrane glycoprotein precursor - Homo sapiens (Human) [MASS=17935]
12	P04264|K2C1_HUMAN	1	9.3	2.17	0.36	5	2.33	0.91	5	2.58	1.01	0.181	5	5	0.55	Keratin, type II cytoskeletal 1 - Homo sapiens (Human) [MASS=66017]
13	P04899|GNAI2_HUMAN	1	11	1.67	0.26	2	0.62	0.36	2	0.69	0.4	0.65	3	3	0.33	Guanine nucleotide-binding protein G(i), alpha-2 subunit - Homo sapiens (Human) [MASS=40451]
14	P05023|AT1A1_HUMAN	1	6.3	1.76	0.17	6	0.89	0.58	4	0.99	0.64	0.987	5	8	0.88	Sodium\potassium-transporting ATPase alpha-1 chain precursor - Homo sapiens (Human) [MASS=112895]
15	P05141|ADT2_HUMAN	1	16.1	1.66	0.28	21	1.53	0.23	4	1.69	0.26	0.388	7	22	2.4	ADP\ATP translocase 2 - Homo sapiens (Human) [MASS=32895]
16	P05388|RLA0_HUMAN	1	3.5	1.64	0.23	2	1.21	0.08	1	1.34	0.1	0.623	2	2	0.22	60S acidic ribosomal protein P0 - Homo sapiens (Human) [MASS=34273]
17	P05556|ITB1_HUMAN	1	3.6	1.77	0.51	6	0.81	0.86	2	0.9	0.95	0.929	3	5	0.54	Integrin beta-1 precursor - Homo sapiens (Human) [MASS=88465]
18	P06576|ATPB_HUMAN	1	8.1	1.04	0.11	3	1.22	0.9	1	1.35	1	0.75	3	5	0.55	ATP synthase subunit beta, mitochondrial precursor - Homo sapiens (Human) [MASS=56559]
19	P07355|ANXA2_HUMAN	1	32.2	1.41	0.37	33	0.61	0.24	9	0.68	0.27	0.581	13	35	3.84	Annexin A2 - Homo sapiens (Human) [MASS=38604]
20	P08133|ANXA6_HUMAN	1	9.2	1.33	0.12	6	1.33	0.69	4	1.47	0.77	0.623	4	6	0.65	Annexin A6 - Homo sapiens (Human) [MASS=75873]
21	P08195|4F2_HUMAN	1	7.6	1.35	0.51	5	0.46	0.23	3	0.51	0.26	0.384	3	5	0.55	4F2 cell-surface antigen heavy chain - Homo sapiens (Human) [MASS=57944]
22	P08473|NEP_HUMAN	1	3.7	5.1	0	1	0.51	0.09	1	0.56	0.1	0.355	2	2	0.22	Neprilysin - Homo sapiens (Human) [MASS=85513]
23	P08574|CY1_HUMAN	1	8.6	1.53	0.1	3	1.71	0.24	2	1.89	0.27	0.294	3	3	0.33	Cytochrome c1 heme protein, mitochondrial precursor - Homo sapiens (Human) [MASS=35390]
24	P08670|VIME_HUMAN	1	12	1.12	0.17	12	0.89	0.14	4	0.99	0.16	0.981	5	12	1.31	Vimentin - Homo sapiens (Human) [MASS=53651]
25	P10606|COX5B_HUMAN	1	19.4	1.24	0.04	3	1.37	0.41	2	1.52	0.46	0.53	2	3	0.32	Cytochrome c oxidase subunit 5B, mitochondrial precursor - Homo sapiens (Human) [MASS=13696]
26	P10620|MGST1_HUMAN	1	19.4	1.85	0.43	9	0.65	0.2	2	0.72	0.22	0.623	3	9	0.99	Microsomal glutathione S-transferase 1 - Homo sapiens (Human) [MASS=17599]
27	P11279|LAMP1_HUMAN	1	6	1.3	0.15	10	1.11	0.21	1	1.23	0.24	0.74	3	11	1.2	Lysosome-associated membrane glycoprotein 1 precursor - Homo sapiens (Human) [MASS=44773]
28	P13645|K1C10_HUMAN	1	3.4	3.42	0.81	4	999	0	2	999	40.88	0	2	4	0.44	Keratin, type I cytoskeletal 10 - Homo sapiens (Human) [MASS=59510]
29	P13987|CD59_HUMAN	1	25	1.71	0.8	6	0.53	0.24	2	0.59	0.27	0.475	4	8	0.88	CD59 glycoprotein precursor - Homo sapiens (Human) [MASS=14177]
30	P15144|AMPN_HUMAN	1	16.8	1.31	0.36	36	0.5	0.17	11	0.55	0.19	0.387	20	44	4.83	Aminopeptidase N - Homo sapiens (Human) [MASS=109539]
31	P16070|CD44_HUMAN	1	9.4	1.25	0.33	11	0.43	0.37	5	0.48	0.41	0.478	8	17	1.87	CD44 antigen precursor - Homo sapiens (Human) [MASS=81553]
32	P19022|CADH2_HUMAN	1	2	1.44	0.42	5	0.59	0.08	1	0.65	0.09	0.484	2	5	0.55	Cadherin-2 precursor - Homo sapiens (Human) [MASS=99809]
33	P21333|FLNA_HUMAN	1	0.9	1.08	0.12	3	0.67	0.16	2	0.74	0.18	0.64	2	3	0.33	Filamin-A - Homo sapiens (Human) [MASS=280737]
34	P21589|5NTD_HUMAN	1	5.1	2.61	0.36	2	0.28	0.23	2	0.31	0.26	0.248	2	2	0.21	5'-nucleotidase precursor - Homo sapiens (Human) [MASS=63367]
35	P21796|VDAC1_HUMAN	1	8.8	1.13	0.08	8	0.85	0.27	3	0.94	0.3	0.928	4	8	0.88	Voltage-dependent anion-selective channel protein 1 - Homo sapiens (Human) [MASS=30772]
36	P22695|UQCR2_HUMAN	1	6.2	1.08	0	4	1.07	0.2	2	1.19	0.23	0.785	2	4	0.44	Ubiquinol-cytochrome-c reductase complex core protein 2, mitochondrial precursor - Homo sapiens (Human) [MASS=48443]
37	P23634|AT2B4_HUMAN	1	10.2	1.45	0.29	10	0.78	0.49	10	0.86	0.54	0.865	10	14	1.7	Plasma membrane calcium-transporting ATPase 4 - Homo sapiens (Human) [MASS=137919]
38	P24539|AT5F1_HUMAN	1	22.7	1.95	0.38	13	1.4	0.38	4	1.55	0.42	0.501	7	13	1.43	ATP synthase B chain, mitochondrial precursor - Homo sapiens (Human) [MASS=28908]
39	P25705|ATPA_HUMAN	1	16.8	1.3	0.2	28	1.14	0.52	7	1.26	0.58	0.755	10	16	1.76	ATP synthase subunit alpha, mitochondrial precursor - Homo sapiens (Human) [MASS=59750]
40	P27824|CALX_HUMAN	1	2.5	1.19	0.13	8	0.87	0.82	1	0.96	0.91	0.973	2	8	0.87	Calnexin precursor - Homo sapiens (Human) [MASS=67568]
41	P29966|MARCS_HUMAN	1	11.1	0.74	0.15	2	1.32	0.3	2	1.46	0.34	0.549	2	2	0.22	Myristoylated alanine-rich C-kinase substrate - Homo sapiens (Human) [MASS=31554]
42	P35232|PHB_HUMAN	1	13.6	1.73	0.49	12	0.76	0.32	3	0.84	0.36	0.813	5	12	1.32	Prohibitin - Homo sapiens (Human) [MASS=29804]
43	P35613|BASI_HUMAN	1	9.6	1.13	0.05	3	0.63	0.61	2	0.7	0.68	0.751	3	4	0.44	Basigin precursor - Homo sapiens (Human) [MASS=42200]
44	P40939|ECHA_HUMAN	1	3.4	1.23	0.04	4	0.89	0.53	2	0.99	0.59	0.986	3	4	0.44	Trifunctional enzyme subunit alpha, mitochondrial precursor - Homo sapiens (Human) [MASS=82999]
45	P45880|VDAC2_HUMAN	1	15.6	1.59	0.3	6	0.99	0.47	3	1.1	0.52	0.903	4	7	0.76	Voltage-dependent anion-selective channel protein 2 - Homo sapiens (Human) [MASS=38092]
46	P46778|RL21_HUMAN	1	9.4	1.02	0.05	3	0.69	0.08	1	0.76	0.09	0.656	2	3	0.33	60S ribosomal protein L21 - Homo sapiens (Human) [MASS=18565]
47	P48047|ATPO_HUMAN	1	18.8	1.27	0.1	13	1.18	0.39	3	1.31	0.43	0.693	5	13	1.43	ATP synthase O subunit, mitochondrial precursor - Homo sapiens (Human) [MASS=23277]
48	P48509|CD151_HUMAN	1	10.7	0.97	0.09	4	0.42	0.15	3	0.47	0.17	0.269	3	4	0.44	CD151 antigen - Homo sapiens (Human) [MASS=28295]
49	P50454|SERPH_HUMAN	1	6.2	1.19	0.07	4	1.34	0.14	2	1.48	0.16	0.512	3	4	0.44	Serpin H1 precursor - Homo sapiens (Human) [MASS=46440]
50	P53007|TXTP_HUMAN	1	9.6	1.13	0.03	3	1.17	0.09	2	1.3	0.11	0.664	3	4	0.44	Tricarboxylate transport protein, mitochondrial precursor - Homo sapiens (Human) [MASS=34012]
51	P54709|AT1B3_HUMAN	1	10.4	1.32	0.18	6	1.24	0.25	2	1.37	0.28	0.612	4	6	0.66	Sodium\potassium-transporting ATPase subunit beta-3 - Homo sapiens (Human) [MASS=31512]
52	P55084|ECHB_HUMAN	1	4.4	1.29	0.16	2	1.54	0.49	2	1.71	0.55	0.427	2	2	0.21	Trifunctional enzyme subunit beta, mitochondrial precursor - Homo sapiens (Human) [MASS=51294]
53	P56134|ATPK_HUMAN	1	25.5	1.41	0.05	3	1.34	0.25	1	1.48	0.28	0.525	3	6	0.66	ATP synthase f chain, mitochondrial - Homo sapiens (Human) [MASS=10918]
54	P60033|CD81_HUMAN	1	6.8	1.58	0.32	8	0.68	0.18	1	0.75	0.2	0.662	2	8	0.87	CD81 antigen - Homo sapiens (Human) [MASS=25809]
55	P60709|ACTB_HUMAN,P63261|ACTG_HUMAN	1	38.9	1.02	0.34	51	0.5	0.17	9	0.55	0.19	0.387	21	62	6.76	Actin, cytoplasmic 1 - Homo sapiens (Human) [MASS=41736],Actin, cytoplasmic 2 - Homo sapiens (Human) [MASS=41793]
56	P61026|RAB10_HUMAN	1	11.5	1.78	0	1	2.7	0.3	1	2.99	0.35	0.0691	2	2	0.22	Ras-related protein Rab-10 - Homo sapiens (Human) [MASS=22541]
57	P61769|B2MG_HUMAN	1	16.8	2.91	0.71	3	0.54	0.4	2	0.6	0.44	0.588	2	3	0.33	Beta-2-microglobulin precursor [Contains: Beta-2-microglobulin variant pI 5.3] - Homo sapiens (Human) [MASS=13714]
58	P62070|RRAS2_HUMAN	1	19.1	1.62	0.26	4	0.86	0.13	3	0.95	0.15	0.937	3	4	0.43	Ras-related protein R-Ras2 precursor - Homo sapiens (Human) [MASS=23399]
59	P62424|RL7A_HUMAN	1	5.3	1.15	0.21	2	-1	0	1	N_A	N_A		2	2	0.22	60S ribosomal protein L7a - Homo sapiens (Human) [MASS=29995]
60	P62491|RB11A_HUMAN,Q15907|RB11B_HUMAN	1	4.2	1.17	0.03	3	1.37	0.15	1	1.52	0.18	0.489	2	3	0.32	Ras-related protein Rab-11A - Homo sapiens (Human) [MASS=24393],Ras-related protein Rab-11B - Homo sapiens (Human) [MASS=24488]
61	P62805|H4_HUMAN	1	21.4	1.29	0.1	5	1.1	0.06	2	1.22	0.08	0.74	3	5	0.55	Histone H4 - Homo sapiens (Human) [MASS=11367]
62	P62834|RAP1A_HUMAN	1	14.7	1.1	0.1	6	0.72	0.04	2	0.8	0.05	0.704	4	6	0.62	Ras-related protein Rap-1A precursor - Homo sapiens (Human) [MASS=20987]
63	P62873|GBB1_HUMAN	1	8.8	1.31	0.26	8	0.5	0.2	3	0.55	0.22	0.408	4	8	0.82	Guanine nucleotide-binding protein G(I)\G(S)\G(T) subunit beta 1 - Homo sapiens (Human) [MASS=37377]
64	P62906|RL10A_HUMAN	1	12	1.12	0.11	2	1.78	0.14	2	1.97	0.17	0.256	2	2	0.22	60S ribosomal protein L10a - Homo sapiens (Human) [MASS=24831]
65	P63000|RAC1_HUMAN	1	15.1	1.91	0.31	9	0.74	0.74	3	0.82	0.82	0.864	4	9	0.99	Ras-related C3 botulinum toxin substrate 1 precursor - Homo sapiens (Human) [MASS=21450]
66	P68363|TBA1B_HUMAN,P68366|TBA4A_HUMAN,Q13748|TBA2_HUMAN,Q71U36|TBA1A_HUMAN,Q9BQE3|TBA1C_HUMAN	1	7.6	1.38	0.26	10	0.97	0.1	2	1.07	0.12	0.905	4	10	1.1	Tubulin alpha-1B chain - Homo sapiens (Human) [MASS=50151],Tubulin alpha-4A chain - Homo sapiens (Human) [MASS=49924],Tubulin alpha-2 chain - Homo sapiens (Human) [MASS=49959],Tubulin alpha-1A chain - Homo sapiens (Human) [MASS=50135],Tubulin alpha-1C cha
67	Q00325|MPCP_HUMAN	1	11.3	1.6	0.21	12	1.28	0.33	4	1.42	0.37	0.589	6	12	1.31	Phosphate carrier protein, mitochondrial precursor - Homo sapiens (Human) [MASS=40095]
68	Q00610|CLH1_HUMAN	1	2	2.88	0.73	3	0.68	0.16	2	0.75	0.18	0.656	2	3	0.33	Clathrin heavy chain 1 - Homo sapiens (Human) [MASS=191613]
69	Q03135|CAV1_HUMAN	1	35.4	1.3	0.55	41	0.41	0.14	5	0.45	0.16	0.248	9	30	3.3	Caveolin-1 - Homo sapiens (Human) [MASS=20471]
70	Q07065|CKAP4_HUMAN	1	15.4	1.17	0.09	11	0.85	0.12	6	0.94	0.14	0.921	8	11	1.21	Cytoskeleton-associated protein 4 - Homo sapiens (Human) [MASS=66022]
71	Q13423|NNTM_HUMAN	1	1	1.26	0.06	4	1.16	0.18	1	1.28	0.2	0.682	2	4	0.44	NAD(P) transhydrogenase, mitochondrial precursor - Homo sapiens (Human) [MASS=113895]
72	Q13505|MTX1_HUMAN	1	4.4	1.48	0.23	5	1.21	0.09	1	1.34	0.11	0.624	2	5	0.55	Metaxin-1 - Homo sapiens (Human) [MASS=35777]
73	Q13637|RAB32_HUMAN	1	7.6	1.63	0.3	4	1.03	0.09	1	1.14	0.11	0.826	2	4	0.43	Ras-related protein Rab-32 - Homo sapiens (Human) [MASS=24997]
74	Q13724|GCS1_HUMAN	1	4.3	1.41	0.15	2	1.15	0.2	2	1.27	0.23	0.695	2	2	0.22	Mannosyl-oligosaccharide glucosidase - Homo sapiens (Human) [MASS=91917]
75	Q15836|VAMP3_HUMAN	1	33	1.4	0.13	4	0.97	0.6	2	1.07	0.67	0.933	3	4	0.44	Vesicle-associated membrane protein 3 - Homo sapiens (Human) [MASS=11309]
76	Q16891|IMMT_HUMAN	1	8.3	1.31	0.08	3	1.55	0.31	2	1.72	0.35	0.387	5	5	0.55	Mitochondrial inner membrane protein - Homo sapiens (Human) [MASS=83677]
77	Q6NZI2|PTRF_HUMAN	1	14.9	1.44	0.4	13	0.4	0.27	4	0.44	0.3	0.365	8	17	1.87	Polymerase I and transcript release factor - Homo sapiens (Human) [MASS=43476]
78	Q6UXV4|APOOL_HUMAN	1	5.2	1.23	0.01	3	2.35	0.31	1	2.6	0.36	0.115	2	3	0.33	Apolipoprotein O-like precursor - Homo sapiens (Human) [MASS=29159]
79	Q8N6Q3|CD177_HUMAN	1	4.1	1.22	0.05	2	1.3	0.55	2	1.44	0.61	0.617	2	2	0.22	CD177 antigen precursor - Homo sapiens (Human) [MASS=46363]
80	Q8NBX0|SCPDH_HUMAN	1	3.3	1.36	0.06	3	1.5	0.18	1	1.66	0.21	0.401	2	3	0.32	Probable saccharopine dehydrogenase - Homo sapiens (Human) [MASS=47151]
81	Q96AG4|LRC59_HUMAN	1	13.4	1.1	0.16	7	1.18	0.47	3	1.31	0.52	0.708	4	7	0.77	Leucine-rich repeat-containing protein 59 - Homo sapiens (Human) [MASS=34930]
82	Q96CW1|AP2M1_HUMAN	1	4.1	0.91	0	2	0	0	1	0	0	0	2	3	0.33	AP-2 complex subunit mu-1 - Homo sapiens (Human) [MASS=49654]
83	Q99623|PHB2_HUMAN	1	16.7	1.57	0.35	10	1.09	0.5	3	1.21	0.56	0.801	5	10	1.1	Prohibitin-2 - Homo sapiens (Human) [MASS=33296]
84	Q9BSJ8|FA62A_HUMAN	1	3.2	1.54	0.35	3	0.33	0.2	2	0.37	0.22	0.235	3	3	0.33	Protein FAM62A - Homo sapiens (Human) [MASS=122856]
85	Q9BWM7|SFXN3_HUMAN	1	4	1.15	0	3	0	0	1	0	0	0	2	3	0.33	Sideroflexin-3 - Homo sapiens (Human) [MASS=35503]
86	Q9H0U4|RAB1B_HUMAN	1	15.4	1.25	0.25	3	0.7	0.12	2	0.78	0.14	0.68	3	3	0.28	Ras-related protein Rab-1B - Homo sapiens (Human) [MASS=22171]
87	Q9H9B4|SFXN1_HUMAN	1	8.1	1.18	0	2	-1	0	1	N_A	N_A		2	5	0.54	Sideroflexin-1 - Homo sapiens (Human) [MASS=35619]
88	Q9NQC3|RTN4_HUMAN	1	1.8	3.48	0	2	1.53	0.81	1	1.69	0.9	0.507	2	4	0.44	Reticulon-4 - Homo sapiens (Human) [MASS=129930]
89	Q9NVI7|ATD3A_HUMAN	1	2.4	1.08	0.02	4	1.06	0.23	1	1.17	0.26	0.799	2	4	0.44	ATPase family AAA domain-containing protein 3A - Homo sapiens (Human) [MASS=71369]
90	Q9NZM1|MYOF_HUMAN	1	7.2	1.3	0.26	26	0.85	0.24	11	0.94	0.27	0.927	16	26	2.85	Myoferlin - Homo sapiens (Human) [MASS=234707]
91	Q9NZN4|EHD2_HUMAN	1	10.1	1.9	0.3	14	0.25	0.03	4	0.28	0.03	0.0336	4	12	1.31	EH domain-containing protein 2 - Homo sapiens (Human) [MASS=61161]
92	Q9P0L0|VAPA_HUMAN	1	5.6	1.52	0.07	2	1.16	0.21	1	1.28	0.24	0.686	2	2	0.22	Vesicle-associated membrane protein-associated protein A - Homo sapiens (Human) [MASS=27893]
93	Q9UBG0|MRC2_HUMAN	1	4.4	1.68	0.16	5	0.75	0.08	4	0.83	0.09	0.758	5	6	0.66	Macrophage mannose receptor 2 precursor - Homo sapiens (Human) [MASS=166654]
94	Q9UBI6|GBG12_HUMAN	1	31.9	1.58	0.54	7	0.48	0.07	2	0.53	0.08	0.3	3	7	0.48	Guanine nucleotide-binding protein G(I)\G(S)\G(O) gamma-12 subunit precursor - Homo sapiens (Human) [MASS=8006]
95	Q9UL25|RAB21_HUMAN	1	7.6	1	0.11	2	0	0	1	0	0	0	2	2	0.22	Ras-related protein Rab-21 - Homo sapiens (Human) [MASS=24347]
96	Q9Y277|VDAC3_HUMAN	1	12	2.01	0.68	5	0.75	0.34	2	0.83	0.38	0.804	2	5	0.55	Voltage-dependent anion-selective channel protein 3 - Homo sapiens (Human) [MASS=30658]
97	Q9Y6C9|MTCH2_HUMAN	1	5.3	1.34	0.06	4	1.01	0.03	1	1.12	0.05	0.85	2	4	0.44	Mitochondrial carrier homolog 2 - Homo sapiens (Human) [MASS=33331]
102	P09619|PGFRB_HUMAN	0.99	1.5	2.68	0	1	999	0	1	999	40.88	0	1	1	0.11	Beta platelet-derived growth factor receptor precursor - Homo sapiens (Human) [MASS=123967]
103	P20645|MPRD_HUMAN	0.99	5.1	1.06	0	1	0.84	0.21	1	0.93	0.24	0.911	1	1	0.11	Cation-dependent mannose-6-phosphate receptor precursor - Homo sapiens (Human) [MASS=30993]
104	P20674|COX5A_HUMAN	0.99	10	0.84	0	1	0.49	0.05	1	0.54	0.06	0.309	1	1	0.11	Cytochrome c oxidase subunit 5A, mitochondrial precursor - Homo sapiens (Human) [MASS=16774]
105	P28331|NDUS1_HUMAN	0.99	2.3	1.11	0	1	1.17	0.19	1	1.3	0.22	0.673	1	1	0.11	NADH-ubiquinone oxidoreductase 75 kDa subunit, mitochondrial precursor - Homo sapiens (Human) [MASS=79467]
106	P35579|MYH9_HUMAN	0.99	0.8	1.66	0	2	0	0	1	0	0	0	1	2	0.22	Myosin-9 - Homo sapiens (Human) [MASS=226531]
107	P49755|TMEDA_HUMAN	0.99	5.5	1.29	0	2	1.98	0.41	1	2.19	0.46	0.211	1	2	0.16	Transmembrane emp24 domain-containing protein 10 precursor - Homo sapiens (Human) [MASS=24976]
108	P51149|RAB7A_HUMAN	0.99	6.3	1.31	0	1	-1	-1	1	N_A	N_A		1	1	0.11	Ras-related protein Rab-7a - Homo sapiens (Human) [MASS=23490]
109	Q14254|FLOT2_HUMAN	0.99	5	1.13	0	2	6.56	5.04	1	7.27	5.59	0.0409	1	2	0.22	Flotillin-2 - Homo sapiens (Human) [MASS=41685]
110	Q16563|SYPL1_HUMAN	0.99	4.2	N_A	N_A	N_A	-1	0	0	N_A	N_A		1	1	0.11	Synaptophysin-like protein 1 - Homo sapiens (Human) [MASS=28565]
111	Q9UJZ1|STML2_HUMAN	0.99	4.2	1.05	0	1	1.81	0.16	1	2	0.19	0.246	1	1	0.11	Stomatin-like protein 2 - Homo sapiens (Human) [MASS=38534]
112	Q9Y639|NPTN_HUMAN	0.99	4.3	N_A	N_A	N_A	-1	0	0	N_A	N_A		1	3	0.32	Neuroplastin precursor - Homo sapiens (Human) [MASS=31291]
113	O95197|RTN3_HUMAN	0.97	1.1	N_A	N_A	N_A	-1	0	0	N_A	N_A		1	1	0.11	Reticulon-3 - Homo sapiens (Human) [MASS=112610]
114	O95782|AP2A1_HUMAN	0.97	1.5	N_A	N_A	N_A	-1	0	0	N_A	N_A		1	1	0.11	AP-2 complex subunit alpha-1 - Homo sapiens (Human) [MASS=107554]
115	P00403|COX2_HUMAN	0.97	4.4	1.57	0	2	1.18	0.5	1	1.31	0.56	0.713	1	2	0.17	Cytochrome c oxidase subunit 2 - Homo sapiens (Human) [MASS=25565]
116	P04844|RIB2_HUMAN	0.97	2.7	1.13	0.02	3	0.87	0.21	1	0.96	0.24	0.954	1	3	0.31	Dolichyl-diphosphooligosaccharide--protein glycosyltransferase 63 kDa subunit precursor - Homo sapiens (Human) [MASS=69283]
117	P16778|VGLI_HCMVA	0.97	3.5	1.46	0	1	1.06	0.16	1	1.17	0.18	0.793	1	1	0.11	Immediate early glycoprotein precursor - Human cytomegalovirus (strain AD169) (HHV-5) (Human herpesvirus 5) [MASS=56124]
118	Q8NE86|C109A_HUMAN	0.97	4.3	1.1	0	1	0.78	0.13	1	0.86	0.15	0.812	1	1	0.11	Coiled-coil domain containing protein 109A - Homo sapiens (Human) [MASS=39867]
119	O95297|MPZL1_HUMAN	0.96	4.8	N_A	N_A	N_A	-1	0	0	N_A	N_A		1	1	0.11	Myelin protein zero-like protein 1 precursor - Homo sapiens (Human) [MASS=29082]
120	P00533|EGFR_HUMAN	0.96	1	N_A	N_A	N_A	-1	0	0	N_A	N_A		1	2	0.2	Epidermal growth factor receptor precursor - Homo sapiens (Human) [MASS=134277]
121	P36021|MOT8_HUMAN	0.96	2.4	N_A	N_A	N_A	-1	0	0	N_A	N_A		1	1	0.11	Monocarboxylate transporter 8 - Homo sapiens (Human) [MASS=59511]
122	P50402|EMD_HUMAN	0.96	5.1	N_A	N_A	N_A	-1	0	0	N_A	N_A		1	1	0.11	Emerin - Homo sapiens (Human) [MASS=28994]
123	P62988|UBIQ_HUMAN	0.96	21.1	1.18	0	2	2.74	0.39	1	3.03	0.45	0.0684	1	2	0.2	Ubiquitin - Homo sapiens (Human) [MASS=8565]
124	Q13308|PTK7_HUMAN	0.96	1.4	1.75	0	1	0.44	0.04	1	0.49	0.05	0.23	1	1	0.11	Tyrosine-protein kinase-like 7 precursor - Homo sapiens (Human) [MASS=118391]
125	Q6EMK4|VASN_HUMAN	0.96	1.9	1.18	0	1	0.8	0.11	1	0.89	0.13	0.842	1	1	0.11	Vasorin precursor - Homo sapiens (Human) [MASS=71712]
126	P08648|ITA5_HUMAN	0.95	1.5	2.55	0	2	0.44	0.03	1	0.49	0.04	0.228	1	2	0.2	Integrin alpha-5 precursor - Homo sapiens (Human) [MASS=114536]
127	P13611|CSPG2_HUMAN	0.95	0.4	1.34	0	1	2.06	0.45	1	2.28	0.51	0.191	1	1	0.1	Versican core protein precursor - Homo sapiens (Human) [MASS=372817]
128	Q969X5|ERGI1_HUMAN	0.95	4.8	0.94	0	1	-1	-1	1	N_A	N_A		1	1	0.1	Endoplasmic reticulum-Golgi intermediate compartment protein 1 - Homo sapiens (Human) [MASS=32592]
129	O60814|H2B1K_HUMAN,P06899|H2B1J_HUMAN,P23527|H2B1O_HUMAN,P33778|H2B1B_HUMAN,P57053|H2BFS_HUMAN,P58876|H2B1D_HUMAN,P62807|H2B1C_HUMAN,Q16778|H2B2E_HUMAN,Q5QNW6|H2B2F_HUMAN,Q8N257|H2B3B_HUMAN,Q93079|H2B1H_HUMAN,Q99877|H2B1N_HUMAN,Q99879|H2B1M_HUMAN,Q99880|H	0.94	11.9	N_A	N_A	N_A	-1	0	0	N_A	N_A		1	2	0.2	Histone H2B type 1-K - Homo sapiens (Human) [MASS=13890],Histone H2B type 1-J - Homo sapiens (Human) [MASS=13904],Histone H2B type 1-O - Homo sapiens (Human) [MASS=13906],Histone H2B type 1-B - Homo sapiens (Human) [MASS=13950],Histone H2B type F-S - Homo
130	P17302|CXA1_HUMAN	0.94	3.9	7.5	0	1	0.13	0.12	1	0.14	0.13	0.0772	1	1	0.1	Gap junction alpha-1 protein - Homo sapiens (Human) [MASS=43008]
131	P46779|RL28_HUMAN	0.94	5.1	2.21	0	2	2.25	0.1	1	2.49	0.14	0.124	1	2	0.2	60S ribosomal protein L28 - Homo sapiens (Human) [MASS=15747]
132	P61803|DAD1_HUMAN	0.94	10.6	1.1	0	2	0	0	1	0	0	0	1	2	0.19	Dolichyl-diphosphooligosaccharide--protein glycosyltransferase subunit DAD1 - Homo sapiens (Human) [MASS=12497]
133	P06756|ITAV_HUMAN	0.93	1.3	1.25	0	2	-1	0	1	N_A	N_A		1	2	0.19	Integrin alpha-V precursor - Homo sapiens (Human) [MASS=116037]
134	P16615|AT2A2_HUMAN	0.93	1.2	1.05	0	1	1.03	0.08	1	1.14	0.1	0.825	1	1	0.1	Sarcoplasmic\endoplasmic reticulum calcium ATPase 2 - Homo sapiens (Human) [MASS=114756]
135	P69905|HBA_HUMAN	0.93	11.3	2.55	0	1	999	0	1	999	40.88	0	1	1	0.1	Hemoglobin subunit alpha - Homo sapiens (Human) [MASS=15257]
136	Q08431|MFGM_HUMAN	0.93	3.9	1	0	1	0.95	0.05	1	1.05	0.07	0.932	1	1	0.1	Lactadherin precursor - Homo sapiens (Human) [MASS=43123]
137	Q15758|AAAT_HUMAN	0.93	3.7	2.21	0	1	0.63	0.09	1	0.7	0.1	0.555	1	1	0.1	Neutral amino acid transporter B(0) - Homo sapiens (Human) [MASS=56598]
138	Q9Y5M8|SRPRB_HUMAN	0.92	5.9	1.2	0	2	1.68	0.3	1	1.86	0.34	0.316	1	2	0.19	Signal recognition particle receptor subunit beta - Homo sapiens (Human) [MASS=29702]
139	P04406|G3P_HUMAN	0.91	4.2	1	0	1	0.73	0.08	1	0.81	0.09	0.724	1	1	0.1	Glyceraldehyde-3-phosphate dehydrogenase - Homo sapiens (Human) [MASS=36053]
140	Q02878|RL6_HUMAN	0.91	4.5	1.04	0	2	1.15	0.21	1	1.27	0.24	0.696	1	2	0.2	60S ribosomal protein L6 - Homo sapiens (Human) [MASS=32728]
141	Q9UHG3|PCYOX_HUMAN	0.9	2.6	1.28	0	1	0	0	1	0	0	0	1	1	0.1	Prenylcysteine oxidase precursor - Homo sapiens (Human) [MASS=56640]
142	Q9HDC9|APMAP_HUMAN	0.89	3.4	0.79	0	1	0.46	0.05	1	0.51	0.06	0.263	1	1	0.1	Adipocyte plasma membrane-associated protein - Homo sapiens (Human) [MASS=46480]
143	Q09666|AHNK_HUMAN	0.88	0.5	2.08	0	1	0.74	0.12	1	0.82	0.14	0.746	1	1	0.1	Neuroblast differentiation-associated protein AHNAK - Homo sapiens (Human) [MASS=312491]
144	Q969V3|NCLN_HUMAN	0.88	2.5	1.09	0	1	999	0	1	999	40.88	0	1	1	0.1	Nicalin precursor - Homo sapiens (Human) [MASS=62974]
145	Q9ULV4|COR1C_HUMAN	0.88	2.7	2.81	0	1	0.28	0.04	1	0.31	0.05	0.0547	1	1	0.1	Coronin-1C - Homo sapiens (Human) [MASS=53249]
146	P26006|ITA3_HUMAN	0.86	1.6	1.9	0	1	1.16	0.16	1	1.28	0.18	0.68	1	1	0.1	Integrin alpha-3 precursor - Homo sapiens (Human) [MASS=118697]
147	P13073|COX41_HUMAN	0.85	6.5	1.5	0	2	0.86	0.06	1	0.95	0.08	0.935	1	2	0.17	Cytochrome c oxidase subunit 4 isoform 1, mitochondrial precursor - Homo sapiens (Human) [MASS=19577]
148	P11142|HSP7C_HUMAN,P54652|HSP72_HUMAN	0.84	2.7	1.06	0	1	-1	-1	1	N_A	N_A		1	1	0.09	Heat shock cognate 71 kDa protein - Homo sapiens (Human) [MASS=70898],Heat shock-related 70 kDa protein 2 - Homo sapiens (Human) [MASS=70020]
149	P16757|UL16_HCMVA	0.84	6.5	6.5	1.23	4	999	0	1	999	40.88	0	1	4	0.32	Hypothetical protein UL16 precursor - Human cytomegalovirus (strain AD169) (HHV-5) (Human herpesvirus 5) [MASS=26147]
150	O95168|NDUB4_HUMAN	0.83	10.1	1.16	0	1	2.24	1.36	1	2.48	1.51	0.284	1	1	0.09	NADH dehydrogenase [ubiquinone] 1 beta subcomplex subunit 4 - Homo sapiens (Human) [MASS=15208]
151	P42704|LPPRC_HUMAN	0.83	1	1.23	0	1	999	0	1	999	40.88	0	1	1	0.09	130 kDa leucine-rich protein - Homo sapiens (Human) [MASS=145200]
152	Q9BTV4|TMM43_HUMAN	0.82	3.8	1.79	0	1	-1	-1	1	N_A	N_A		1	1	0.09	Transmembrane protein 43 - Homo sapiens (Human) [MASS=44875]
153	P80723|BASP_HUMAN	0.8	6.2	0.96	0	1	0.84	0.1	1	0.93	0.12	0.905	1	1	0.09	Brain acid soluble protein 1 - Homo sapiens (Human) [MASS=22693]
154	P78324|SHPS1_HUMAN	0.79	3	1.7	0	1	0.78	0.27	1	0.86	0.3	0.831	1	1	0.09	Tyrosine-protein phosphatase non-receptor type substrate 1 precursor - Homo sapiens (Human) [MASS=54812]
155	O43795|MYO1B_HUMAN,Q9UBC5|MYO1A_HUMAN	0.78	1.6	1.2	0	1	0.84	0.1	2	0.93	0.12	0.905	1	1	0.28	Myosin-Ib - Homo sapiens (Human) [MASS=131984],Myosin-Ia - Homo sapiens (Human) [MASS=118400]
156	P08134|RHOC_HUMAN,P61586|RHOA_HUMAN	0.77	7.8	2.8	0	2	0.45	0.02	1	0.5	0.03	0.241	1	2	0.15	Rho-related GTP-binding protein RhoC precursor - Homo sapiens (Human) [MASS=22006],Transforming protein RhoA precursor - Homo sapiens (Human) [MASS=21768]
157	P14625|ENPL_HUMAN	0.77	1.7	1.01	0	1	999	0	1	999	40.88	0	1	1	0.09	Endoplasmin precursor - Homo sapiens (Human) [MASS=92468]
158	O75955|FLOT1_HUMAN	0.76	2.6	1.58	0	1	1.38	0.22	1	1.53	0.25	0.489	1	1	0.08	Flotillin-1 - Homo sapiens (Human) [MASS=47355]
159	Q9P246|STIM2_HUMAN	0.76	1.2	1.09	0	1	1.1	0.22	1	1.22	0.25	0.752	1	1	0.08	Stromal interaction molecule 2 precursor - Homo sapiens (Human) [MASS=83971]
160	Q9H3N1|TXND1_HUMAN	0.75	4.6	1.07	0	1	0.89	0.16	1	0.99	0.18	0.982	1	1	0.08	Thioredoxin domain-containing protein 1 precursor - Homo sapiens (Human) [MASS=31791]
161	Q9UHQ9|NB5R1_HUMAN	0.75	5.2	3.4	0	1	0.4	0.02	1	0.44	0.03	0.171	1	1	0.08	NADH-cytochrome b5 reductase 1 - Homo sapiens (Human) [MASS=34095]
162	O14949|UCRQ_HUMAN	0.74	15.9	1.05	0	1	1.47	0.1	1	1.63	0.13	0.414	1	1	0.08	Ubiquinol-cytochrome c reductase complex ubiquinone-binding protein QP-C - Homo sapiens (Human) [MASS=9906]
163	Q9NYQ6|CELR1_HUMAN	0.72	0.5	4.79	0	1	6.47	1.05	1	7.17	1.19	0.00134	1	1	0.08	Cadherin EGF LAG seven-pass G-type receptor 1 precursor - Homo sapiens (Human) [MASS=329484]
164	P36796|VE2_HPV52	0.67	5.4	4.65	0	1	0.2	0.19	1	0.22	0.21	0.178	1	1	0.07	Regulatory protein E2 - Human papillomavirus type 52 [MASS=41739]
165	Q01082|SPTB2_HUMAN	0.67	0.5	2.49	0	1	0	0	1	0	0	0	1	1	0.07	Spectrin beta chain, brain 1 - Homo sapiens (Human) [MASS=274607]
166	P51572|BAP31_HUMAN	0.66	5.7	1.71	0	1	3.97	0.57	1	4.4	0.65	0.0151	1	1	0.07	B-cell receptor-associated protein 31 - Homo sapiens (Human) [MASS=27991]
167	Q04941|PLP2_HUMAN	0.66	8.6	N_A	N_A	N_A	-1	0	0	N_A	N_A		1	2	0.13	Proteolipid protein 2 - Homo sapiens (Human) [MASS=16691]
168	Q9Y6A9|SPCS1_HUMAN	0.66	14.7	1.44	0	1	-1	-1	1	N_A	N_A		1	1	0.07	Signal peptidase complex subunit 1 - Homo sapiens (Human) [MASS=11805]
169	O43707|ACTN4_HUMAN,P12814|ACTN1_HUMAN	0.64	1.3	1.6	0	1	1.36	0.17	1	1.51	0.2	0.499	1	1	0.07	Alpha-actinin-4 - Homo sapiens (Human) [MASS=104853],Alpha-actinin-1 - Homo sapiens (Human) [MASS=103057]
170	O94826|TOM70_HUMAN	0.62	2.1	1.08	0	1	0.82	0.07	1	0.91	0.08	0.872	1	1	0.07	Mitochondrial precursor proteins import receptor - Homo sapiens (Human) [MASS=67454]
100a	P07437|TBB5_HUMAN,P68371|TBB2C_HUMAN,Q13885|TBB2A_HUMAN,Q9BVA1|TBB2B_HUMAN	1	7.2	1.3	0.08	4	0.66	0.17	2	0.73	0.19	0.628	2	4	0.39	Tubulin beta chain - Homo sapiens (Human) [MASS=49671],Tubulin beta-2C chain - Homo sapiens (Human) [MASS=49831],Tubulin beta-2A chain - Homo sapiens (Human) [MASS=49907],Tubulin beta-2B chain - Homo sapiens (Human) [MASS=49953]
101a	P20020|AT2B1_HUMAN	1	6	1.64	0	2	0.84	0.14	4	0.93	0.16	0.907	3	4	0.6	Plasma membrane calcium-transporting ATPase 1 - Homo sapiens (Human) [MASS=138754]
98a	P01891|1A68_HUMAN,P10316|1A69_HUMAN,P13746|1A11_HUMAN,P18462|1A25_HUMAN,P30450|1A26_HUMAN,P30453|1A34_HUMAN,P30456|1A43_HUMAN,P30457|1A66_HUMAN,P30475|1B39_HUMAN,Q29836|1B67_HUMAN,Q95365|1B38_HUMAN	1	6	1.91	0	1	0.47	0.04	1	0.52	0.05	0.275	2	3	0.26	HLA class I histocompatibility antigen, A-68 alpha chain precursor - Homo sapiens (Human) [MASS=40909],HLA class I histocompatibility antigen, A-69 alpha chain - Homo sapiens (Human) [MASS=40977],HLA class I histocompatibility antigen, A-11 alpha chain pr
99a	P04908|H2A1B_HUMAN,P0C0S8|H2A1_HUMAN,P20671|H2A1D_HUMAN,P28001|H2A1E_HUMAN,Q16777|H2A2C_HUMAN,Q6FI13|H2A2A_HUMAN,Q7L7L0|H2A3_HUMAN,Q93077|H2A1C_HUMAN,Q96KK5|H2A1H_HUMAN,Q99878|H2A1J_HUMAN	1	14.7	1.44	0.14	6	1.5	0.53	1	1.66	0.59	0.462	2	6	0.55	Histone H2A type 1-B - Homo sapiens (Human) [MASS=14135],Histone H2A type 1 - Homo sapiens (Human) [MASS=14091],Histone H2A type 1-D - Homo sapiens (Human) [MASS=14107],Histone H2A type 1-E - Homo sapiens (Human) [MASS=14135],Histone H2A type 2-C - Homo s
